# Supplementary material for: Electronic structure and spectra of (Cu2O)n–H2O complexes
Source: Royal Society of Chemistry journal article supplement (doi:10.1039/c4cp04303k), 2014-11-07
Supplement: c4cp04303k1.pdf [file c4cp04303k1.pdf]

Supplementary Information

**Electronic structure and spectra of  $(\text{Cu}_2\text{O})_n\text{-H}_2\text{O}$  complexes**

Ioannis D. Petsalakis,<sup>\*a,b</sup> Giannoula Theodorakopoulos<sup>a,b</sup> and Jerry Whitten<sup>b</sup>

<sup>a</sup> *Theoretical and Physical Chemistry Institute, The National Hellenic Research Foundation, 48 Vassileos Constantinou Ave, Athens 116 35, Greece. Fax: +30210 7273794; Tel: +30210 7273807; E-mail: [idpet@eie.gr](mailto:idpet@eie.gr)*

<sup>b</sup> *Department of Chemistry, North Carolina State University, Raleigh, North Carolina, 27695, USA, Fax: (919) 515-5079; Tel: (919) 515-7960; E-mail: [whitten@ncsu.edu](mailto:whitten@ncsu.edu)*

Contents

Figure S1: Figure S1: Calculated absorption spectra of  $(\text{Cu}_2\text{O})_n$  clusters for  $n=1-6$  (page 2)

Figure S2: Calculated absorption spectrum of  $\text{Cu}_2\text{O-OH}_2$  at the optimum geometry of the first excited singlet state. (page 2)

Coordinates x,y,z for the optimum structures (pages 3-21)

Details of the Configuration Interaction Method and calculations (pages 22-25)

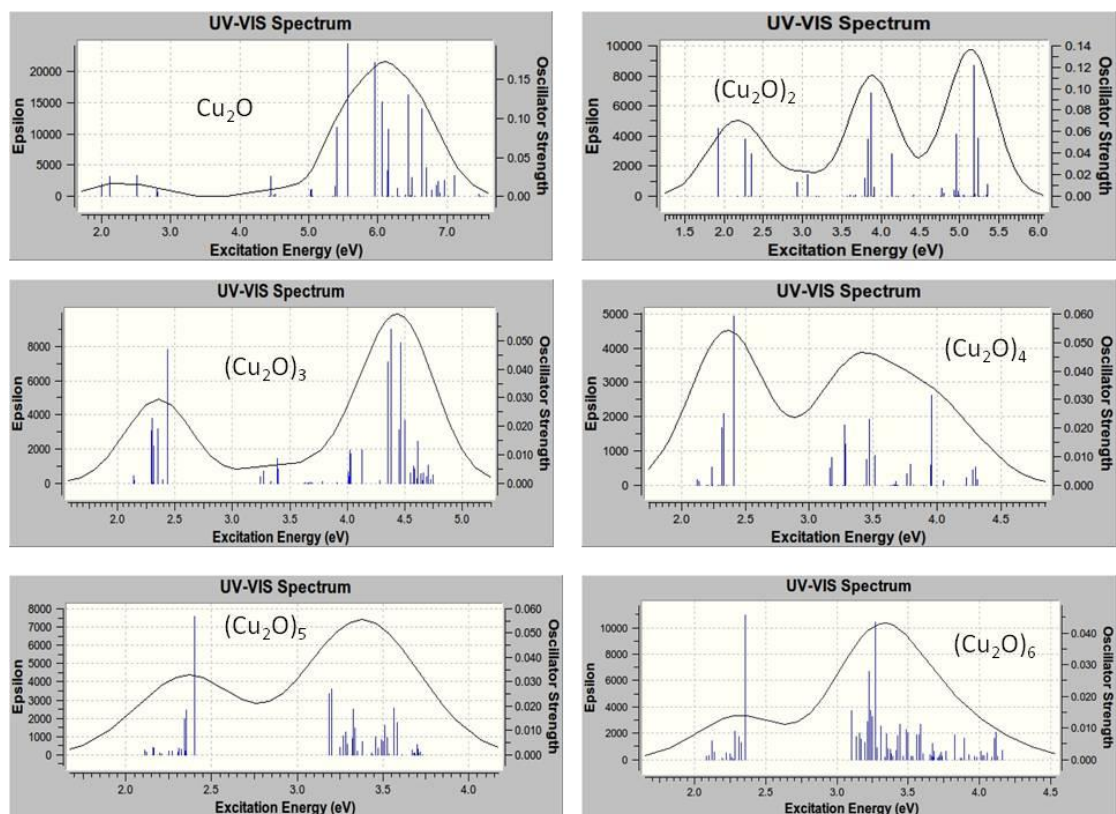

Figure S1: Calculated absorption spectra of  $(\text{Cu}_2\text{O})_n$  clusters for  $n=1-6$

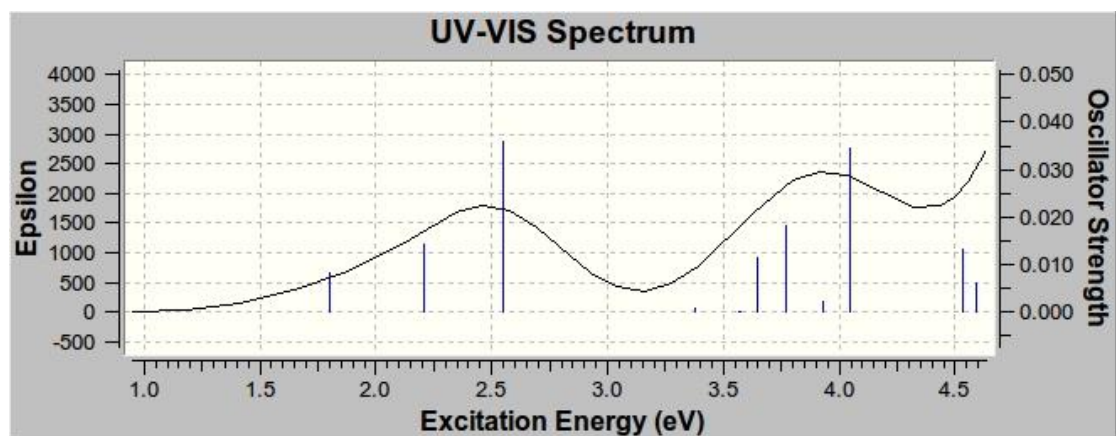

Figure S2: Calculated absorption spectrum of  $\text{Cu}_2\text{O-OH}_2$  at the optimum geometry of the first excited singlet state.

Coordinates x,y,z for the optimum structures

Cu2O\_6311gdp\_b3lyp

|    |            |             |             |
|----|------------|-------------|-------------|
| O  | 0.00000000 | 0.00000000  | 0.89949500  |
| Cu | 0.00000000 | 1.42780000  | -0.12406800 |
| Cu | 0.00000000 | -1.42780000 | -0.12406800 |

Cu4O2\_b3lyp\_6311gdp

|    |             |             |             |
|----|-------------|-------------|-------------|
| O  | -1.50196200 | 0.00000400  | 0.42105700  |
| O  | 1.50175600  | -0.00000300 | -0.42034700 |
| Cu | 3.19955700  | -0.00000200 | 0.05402900  |
| Cu | -0.00010000 | -1.10148100 | 0.00035200  |
| Cu | -0.00008800 | 1.10148100  | 0.00035100  |
| Cu | -3.19931200 | 0.00000200  | -0.05492800 |

Cu6O3\_b3lyp\_6311gdp

|    |             |             |             |
|----|-------------|-------------|-------------|
| O  | -2.01267800 | -0.00316800 | -0.59562600 |
| O  | 0.91512000  | 1.80528400  | 0.48969600  |
| O  | 0.91957200  | -1.80374600 | 0.49129300  |
| Cu | 1.90574300  | 3.04506200  | -0.27747900 |
| Cu | 1.30018900  | 0.00135400  | 0.56173300  |
| Cu | -0.72152000 | 1.22271000  | -0.11330200 |

|    |             |             |             |
|----|-------------|-------------|-------------|
| Cu | -3.62972000 | -0.00336300 | 0.11325000  |
| Cu | 1.91283100  | -3.04003200 | -0.27809800 |
| Cu | -0.71842300 | -1.22528100 | -0.11241000 |

Cu8O4\_6311gdp\_b3lyp

|    |             |             |             |
|----|-------------|-------------|-------------|
| O  | -1.70674000 | 1.81258300  | 0.56586400  |
| Cu | -2.91861300 | 2.80427300  | -0.25653900 |
| Cu | -1.87571800 | 0.00540900  | 0.55293500  |
| O  | 1.70972800  | -1.81606500 | -0.55696800 |
| Cu | -0.00697500 | -1.94638800 | -0.00274200 |
| Cu | 2.91700300  | -2.80042300 | 0.28104000  |
| O  | 1.71872000  | 1.79958400  | -0.56338000 |
| Cu | 0.00716000  | 1.94324800  | 0.00324600  |
| Cu | 1.87565600  | -0.00857200 | -0.55285000 |
| O  | -1.72170900 | -1.80301800 | 0.55433700  |
| Cu | -2.93916400 | -2.77894800 | -0.27870000 |
| Cu | 2.94065200  | 2.78330900  | 0.25365200  |

Cu10O5\_6311gdp\_b3lyp

|    |             |             |             |
|----|-------------|-------------|-------------|
| O  | 1.81217600  | 2.45020300  | -0.27707400 |
| O  | 2.84706600  | -1.00058400 | -0.30548500 |
| O  | -0.08584200 | -3.06693800 | -0.05604800 |
| O  | -2.91734800 | -0.88354400 | 0.35916400  |
| O  | -1.78187500 | 2.49789600  | -0.12404300 |
| Cu | 2.40511600  | 0.74687000  | -0.24054000 |

|    |             |             |             |
|----|-------------|-------------|-------------|
| Cu | 1.41310100  | -2.07855000 | -0.18222100 |
| Cu | -1.53108200 | -2.01455500 | 0.15873700  |
| Cu | -2.39790500 | 0.82416400  | 0.12392600  |
| Cu | 0.01586400  | 2.52427100  | -0.20632700 |
| Cu | 4.25095600  | -1.52040200 | 0.63896700  |
| Cu | 2.59058400  | 3.58948300  | 0.83450300  |
| Cu | -2.56258400 | 3.33498300  | -1.48003700 |
| Cu | -3.86151300 | -1.16194700 | 1.83353200  |
| Cu | -0.28782800 | -4.24349900 | -1.36923400 |

Cu12O6\_6311gdp\_b3lyp

|    |             |             |             |
|----|-------------|-------------|-------------|
| O  | -3.02531500 | 1.89289600  | 0.18877700  |
| O  | 0.13913300  | 3.54236300  | -0.21215000 |
| O  | 3.17480900  | 1.66996700  | 0.20780700  |
| O  | 3.03953500  | -1.89845900 | -0.20790200 |
| O  | -0.12744600 | -3.55261500 | 0.18017800  |
| O  | -3.16828600 | -1.67766200 | -0.18370200 |
| Cu | 1.65954200  | 2.61050900  | -0.00198700 |
| Cu | 3.10691200  | -0.11501900 | 0.00259600  |
| Cu | 1.45556600  | -2.72621900 | -0.02111900 |
| Cu | -1.64932200 | -2.61699800 | -0.00932700 |
| Cu | -3.10758100 | 0.10890000  | -0.00065000 |
| Cu | -1.44573000 | 2.72186600  | -0.01624700 |
| Cu | 4.04602300  | 2.16433200  | 1.66839200  |
| Cu | 0.16574000  | 4.55227100  | -1.67192700 |
| Cu | -3.88610900 | 2.45029900  | 1.63867700  |

|    |             |             |             |
|----|-------------|-------------|-------------|
| Cu | -4.11401700 | -2.15026300 | -1.60356400 |
| Cu | -0.16720600 | -4.53316700 | 1.66131400  |
| Cu | 3.92723600  | -2.46002600 | -1.63871200 |

Ring structures with water

Cu2O\_H2O\_6311gdp\_b3lyp

|    |             |             |            |
|----|-------------|-------------|------------|
| O  | -1.07334700 | -0.37718100 | 0.00000000 |
| Cu | 0.00000000  | 1.02362300  | 0.00000000 |
| Cu | -0.10698300 | -1.83822300 | 0.00000000 |
| O  | 1.10465900  | 2.57398800  | 0.00000000 |
| H  | 0.78756300  | 3.48094400  | 0.00000000 |
| H  | 2.06443700  | 2.56800300  | 0.00000000 |

Cu4O2\_H2O\_6311gdp\_b3lyp

|    |             |             |             |
|----|-------------|-------------|-------------|
| O  | -1.18752000 | 0.00529300  | -0.79622300 |
| O  | 1.77597400  | -0.00107100 | 0.20933800  |
| Cu | 3.52772300  | -0.00415900 | 0.41581400  |
| Cu | 0.29888500  | 1.09961500  | -0.31599000 |
| Cu | 0.29835600  | -1.09335900 | -0.32770900 |
| Cu | -2.72726400 | 0.00045400  | 0.06821200  |
| O  | -4.41079600 | -0.00213300 | 0.94866600  |

|   |             |             |            |
|---|-------------|-------------|------------|
| H | -4.93114500 | -0.81300400 | 0.95574600 |
| H | -5.02342300 | 0.72229000  | 0.78049400 |

Cu6O3\_H2O\_6311gdp\_b3lyp

|    |             |             |             |
|----|-------------|-------------|-------------|
| O  | -1.71677600 | -0.01206000 | -0.76068500 |
| O  | 1.12995700  | 1.81235200  | 0.51462300  |
| O  | 1.15396400  | -1.79906100 | 0.51350700  |
| Cu | 2.16036300  | 3.04271000  | -0.21325300 |
| Cu | 1.51596100  | 0.00886500  | 0.62090900  |
| Cu | -0.45378900 | 1.21298100  | -0.21242900 |
| Cu | -3.34416100 | -0.01845500 | -0.06601700 |
| Cu | 2.19944400  | -3.02163100 | -0.20574700 |
| Cu | -0.43820600 | -1.22237600 | -0.21389200 |
| O  | -5.09897600 | -0.03246100 | 0.64952300  |
| H  | -5.75703200 | -0.61735500 | 0.25878100  |
| H  | -5.53703200 | 0.80645200  | 0.82791600  |

Cu8O4\_H2O\_6311gdp\_b3lyp

|    |             |             |             |
|----|-------------|-------------|-------------|
| O  | 0.48810700  | -2.46623600 | 0.55677300  |
| Cu | 0.93413400  | -3.89870700 | -0.38345300 |
| Cu | 1.68185200  | -1.09778200 | 0.61737300  |
| O  | -0.03489800 | 2.49659300  | -0.65277800 |
| Cu | 1.37705200  | 1.57999400  | 0.01119200  |
| Cu | -0.50395700 | 3.97587700  | 0.19874400  |
| O  | -2.21526300 | -0.39167900 | -0.63944700 |

|    |             |             |             |
|----|-------------|-------------|-------------|
| Cu | -0.93632600 | -1.53232300 | -0.06207200 |
| Cu | -1.24429000 | 1.13887400  | -0.65996300 |
| O  | 2.62932600  | 0.45142000  | 0.67022700  |
| Cu | 4.22397800  | 0.49220300  | -0.09582100 |
| Cu | -3.82277300 | -0.46656200 | 0.09596600  |
| O  | -5.55921100 | -0.56069000 | 0.84950800  |
| H  | -6.31782300 | -0.57291100 | 0.25556200  |
| H  | -5.72710400 | -1.21797700 | 1.53323200  |

Cu10O5\_H2O\_6311gdp\_b3lyp

|    |             |             |             |
|----|-------------|-------------|-------------|
| O  | 2.63584300  | 1.80786000  | -0.14883300 |
| O  | 2.63491100  | -1.79550600 | -0.15959600 |
| O  | -0.78562400 | -2.90297800 | -0.25888100 |
| O  | -2.88795800 | -0.00047600 | 0.08740600  |
| O  | -0.78834100 | 2.90165800  | -0.27577700 |
| Cu | 2.70799700  | 0.00597800  | -0.09428100 |
| Cu | 0.94026000  | -2.39774900 | -0.20805500 |
| Cu | -1.87073600 | -1.47275300 | -0.09640400 |
| Cu | -1.87304500 | 1.47240900  | -0.10469800 |
| Cu | 0.93858500  | 2.40228300  | -0.21332300 |
| Cu | 3.67298000  | -2.67115000 | 0.97661700  |
| Cu | 3.63537600  | 2.67605000  | 1.02744000  |
| Cu | -1.20846800 | 3.82392000  | -1.73370200 |
| Cu | -4.07325000 | -0.00655500 | 1.40373800  |
| Cu | -1.20326400 | -3.82452000 | -1.71847700 |
| O  | -5.36992000 | -0.01034100 | 2.78760800  |



|   |             |             |            |
|---|-------------|-------------|------------|
| H | -6.09629100 | 0.62074600  | 2.74553800 |
| H | -5.74157100 | -0.85195900 | 3.07224900 |

Cu12O6\_H2O\_6311gdp\_b3lyp

|    |             |             |             |
|----|-------------|-------------|-------------|
| O  | 3.42474900  | -0.04649900 | -0.03640500 |
| O  | 1.57680800  | -3.11131000 | -0.37374200 |
| O  | -1.95999200 | -3.07574600 | 0.26159000  |
| O  | -3.74050900 | 0.03682300  | 0.01416500  |
| O  | -1.90163200 | 3.11860500  | 0.21801000  |
| O  | 1.64905900  | 3.06552800  | -0.32712500 |
| Cu | -0.18972400 | -3.09780500 | -0.04839900 |
| Cu | -2.85359900 | -1.52147600 | 0.14261300  |
| Cu | -2.82366500 | 1.57964400  | 0.11923600  |
| Cu | -0.12467600 | 3.09744300  | -0.05238700 |
| Cu | 2.53498500  | 1.50540500  | -0.20114000 |
| Cu | 2.49691300  | -1.57270200 | -0.22395300 |
| Cu | -2.41196400 | -3.99261900 | 1.71095400  |
| Cu | 1.92580500  | -3.84526100 | -1.95428700 |
| Cu | 4.65300400  | -0.07722000 | 1.24077700  |
| Cu | 2.11623200  | 3.89078700  | -1.82833600 |
| Cu | -2.34568700 | 4.05715700  | 1.65671300  |
| Cu | -4.80288800 | 0.03821500  | -1.40872700 |
| O  | 5.98937100  | -0.09978600 | 2.58653600  |
| H  | 6.86656100  | -0.43019900 | 2.36486500  |
| H  | 5.76322900  | -0.45619000 | 3.45204900  |

## Barel structures

### geom\_start\_3-Cu12O6

|    |             |             |             |
|----|-------------|-------------|-------------|
| O  | -3.35917100 | 0.00000000  | 0.00000000  |
| O  | -1.67958500 | 2.90912700  | 0.00000000  |
| O  | 1.67958500  | 2.90912700  | 0.00000000  |
| O  | 3.35917100  | 0.00000000  | 0.00000000  |
| O  | 1.67958500  | -2.90912700 | 0.00000000  |
| O  | -1.67958500 | -2.90912700 | 0.00000000  |
| Cu | 0.00000000  | 4.21655900  | 0.00000000  |
| Cu | 0.00000000  | 1.87987800  | 0.00000000  |
| Cu | 3.06507600  | 1.76962300  | 1.18610200  |
| Cu | 3.06507600  | 1.76962300  | -1.18610200 |
| Cu | 3.65164700  | -2.10827900 | 0.00000000  |
| Cu | 1.62802200  | -0.93993900 | 0.00000000  |
| Cu | 0.00000000  | -3.53924500 | 1.18610200  |
| Cu | 0.00000000  | -3.53924500 | -1.18610200 |
| Cu | -3.65164700 | -2.10827900 | 0.00000000  |
| Cu | -1.62802200 | -0.93993900 | 0.00000000  |
| Cu | -3.06507600 | 1.76962300  | 1.18610200  |
| Cu | -3.06507600 | 1.76962300  | -1.18610200 |
| O  | -2.90912700 | 1.67958500  | -3.56013100 |
| O  | 0.00000000  | 3.35917100  | -3.56013100 |
| O  | 2.90912700  | 1.67958500  | -3.56013100 |

|    |             |             |             |
|----|-------------|-------------|-------------|
| O  | 2.90912700  | -1.67958500 | -3.56013100 |
| O  | 0.00000000  | -3.35917100 | -3.56013100 |
| O  | -2.90912700 | -1.67958500 | -3.56013100 |
| Cu | 1.76962300  | 3.06507600  | -2.37403000 |
| Cu | 1.76962300  | 3.06507600  | -4.74623300 |
| Cu | 4.21655900  | 0.00000000  | -3.56013100 |
| Cu | 1.87987800  | 0.00000000  | -3.56013100 |
| Cu | 1.76962300  | -3.06507600 | -2.37403000 |
| Cu | 1.76962300  | -3.06507600 | -4.74623300 |
| Cu | -2.10827900 | -3.65164700 | -3.56013100 |
| Cu | -0.93993900 | -1.62802200 | -3.56013100 |
| Cu | -3.53924500 | 0.00000000  | -2.37403000 |
| Cu | -3.53924500 | 0.00000000  | -4.74623300 |
| Cu | -2.10827900 | 3.65164700  | -3.56013100 |
| Cu | -0.93993900 | 1.62802200  | -3.56013100 |
| O  | -2.90912700 | 1.67958500  | 3.56013100  |
| O  | 0.00000000  | 3.35917100  | 3.56013100  |
| O  | 2.90912700  | 1.67958500  | 3.56013100  |
| O  | 2.90912700  | -1.67958500 | 3.56013100  |
| O  | 0.00000000  | -3.35917100 | 3.56013100  |
| O  | -2.90912700 | -1.67958500 | 3.56013100  |
| Cu | 1.76962300  | 3.06507600  | 4.74623300  |
| Cu | 1.76962300  | 3.06507600  | 2.37403000  |
| Cu | 4.21655900  | 0.00000000  | 3.56013100  |
| Cu | 1.87987800  | 0.00000000  | 3.56013100  |
| Cu | 1.76962300  | -3.06507600 | 4.74623300  |
| Cu | 1.76962300  | -3.06507600 | 2.37403000  |

|    |             |             |            |
|----|-------------|-------------|------------|
| Cu | -2.10827900 | -3.65164700 | 3.56013100 |
| Cu | -0.93993900 | -1.62802200 | 3.56013100 |
| Cu | -3.53924500 | 0.00000000  | 4.74623300 |
| Cu | -3.53924500 | 0.00000000  | 2.37403000 |
| Cu | -2.10827900 | 3.65164700  | 3.56013100 |
| Cu | -0.93993900 | 1.62802200  | 3.56013100 |

geom\_partially-opt\_3-Cu12O6\_m062x\_lanl2dz

|    |             |             |             |
|----|-------------|-------------|-------------|
| O  | -0.00957900 | 1.86909900  | 1.35115000  |
| O  | -0.12979300 | -0.82700800 | 3.84013000  |
| O  | -0.09095500 | -2.08581100 | 0.91706500  |
| O  | 0.06398000  | -2.91588000 | -2.66198300 |
| O  | 0.09612000  | 0.25501600  | -2.29132200 |
| O  | 0.07141600  | 3.75078100  | -1.21888900 |
| Cu | -0.13305100 | -2.59688300 | 2.96925900  |
| Cu | -0.06334100 | -0.11420500 | 1.78081800  |
| Cu | -1.82983900 | -3.08763000 | -2.63877600 |
| Cu | 1.95253400  | -3.09182400 | -2.54712300 |
| Cu | 0.11420600  | -1.27032900 | -3.74840900 |
| Cu | -0.00091900 | -1.47625600 | -1.01363100 |
| Cu | -1.81866000 | 3.79519200  | -1.42090500 |
| Cu | 1.96834100  | 3.77353000  | -1.35512600 |
| Cu | 0.02977400  | 3.89519000  | 0.74968600  |
| Cu | 0.05519500  | 1.60910200  | -0.78173600 |
| Cu | -2.02383200 | -0.67777300 | 3.91281000  |
| Cu | 1.76193900  | -0.71061200 | 3.99926600  |

|    |             |             |             |
|----|-------------|-------------|-------------|
| O  | 3.65834200  | -0.77446400 | 3.67889100  |
| O  | 3.58616100  | -2.98393900 | 1.33799200  |
| O  | 3.84167500  | -2.77546900 | -2.34221100 |
| O  | 3.82215600  | 0.35632500  | -3.08189200 |
| O  | 3.85065000  | 3.45910300  | -1.09487200 |
| O  | 3.69214100  | 2.49649200  | 1.97550200  |
| Cu | 1.70858100  | -2.73223500 | 0.99712700  |
| Cu | 4.03936100  | -3.23838700 | -0.49855400 |
| Cu | 4.18369400  | -1.48757000 | -3.84087400 |
| Cu | 3.90651200  | -0.85713800 | -1.44131300 |
| Cu | 1.92519500  | 0.50734300  | -2.78196600 |
| Cu | 4.19273700  | 2.10649400  | -2.40341700 |
| Cu | 4.13208900  | 4.07687400  | 0.78774200  |
| Cu | 3.79595200  | 1.69578300  | 0.09613300  |
| Cu | 1.79513600  | 2.17684500  | 1.89414400  |
| Cu | 4.01249800  | 1.02974200  | 3.15814600  |
| Cu | 3.94758900  | -2.72326400 | 3.31412800  |
| Cu | 3.71638100  | -0.95131900 | 1.56028700  |
| O  | -3.90807900 | -0.69500600 | 3.51347300  |
| O  | -3.81040600 | -2.89088300 | 1.16406400  |
| O  | -3.71883800 | -2.74597800 | -2.51116700 |
| O  | -3.59097300 | 0.39395500  | -3.20473200 |
| O  | -3.71482300 | 3.51134700  | -1.23115500 |
| O  | -3.70894200 | 2.60754400  | 1.85904300  |
| Cu | -4.12386700 | -3.20871100 | -0.69945800 |
| Cu | -1.91525200 | -2.65030500 | 0.91538300  |
| Cu | -4.04466300 | -1.42102400 | -3.97372800 |

|    |             |             |             |
|----|-------------|-------------|-------------|
| Cu | -3.63813600 | -0.84167400 | -1.56670100 |
| Cu | -3.98549400 | 2.13705400  | -2.53265500 |
| Cu | -1.70093500 | 0.54371300  | -2.87564900 |
| Cu | -4.06384900 | 4.17554000  | 0.62489700  |
| Cu | -3.78084700 | 1.77148300  | -0.01003600 |
| Cu | -4.13222300 | 1.12855300  | 2.98978900  |
| Cu | -1.82039000 | 2.23349300  | 1.83894500  |
| Cu | -4.18492000 | -2.64709400 | 3.14349400  |
| Cu | -3.97756600 | -0.87314000 | 1.39825400  |

2-ring\_geom\_2-Cu12O6\_b3lyp\_lanl2dz

|    |             |             |             |
|----|-------------|-------------|-------------|
| O  | -0.56405600 | -3.70687800 | -1.85344600 |
| O  | -3.47189500 | -1.35909300 | -1.93063600 |
| O  | -2.94688100 | 2.34234100  | -1.86232500 |
| O  | 0.54807600  | 3.66735600  | -1.94492800 |
| O  | 3.49673900  | 1.37013700  | -1.87443400 |
| O  | 2.90589600  | -2.32036700 | -1.93352300 |
| Cu | -3.18294200 | 0.51404600  | -2.04363000 |
| Cu | -1.21518000 | 2.97275800  | -2.05071100 |
| Cu | 2.03060400  | 2.48710900  | -2.06144700 |
| Cu | 3.18496100  | -0.44700600 | -2.05594500 |
| Cu | 1.13814800  | -3.00226300 | -2.04259400 |
| Cu | -1.98428600 | -2.53315200 | -2.04433400 |
| Cu | -3.04568700 | 2.42827900  | 0.01486700  |
| Cu | -4.79478800 | -1.83987800 | -3.12366500 |

|    |             |             |             |
|----|-------------|-------------|-------------|
| Cu | -0.58248500 | -3.82823000 | 0.02228100  |
| Cu | 4.00266900  | -3.21970800 | -3.11330400 |
| Cu | 3.61943900  | 1.41868700  | 0.00073100  |
| Cu | 0.73451500  | 5.12421800  | -3.05958100 |
| O  | -0.55191000 | -3.66921200 | 1.94076600  |
| O  | -3.49688600 | -1.36748100 | 1.86316000  |
| O  | -2.90790200 | 2.32339700  | 1.93091200  |
| O  | 0.56370600  | 3.70330000  | 1.84929900  |
| O  | 3.47399400  | 1.35867400  | 1.91820900  |
| O  | 2.94101400  | -2.34057600 | 1.85948700  |
| Cu | -3.18190700 | 0.44849800  | 2.04556100  |
| Cu | -1.13754600 | 2.99641600  | 2.04053000  |
| Cu | 1.98463700  | 2.53020500  | 2.03649600  |
| Cu | 3.18246500  | -0.51290100 | 2.04039300  |
| Cu | 1.21108200  | -2.97462400 | 2.04776300  |
| Cu | -2.03189500 | -2.48530800 | 2.05289300  |
| Cu | -3.97287200 | 3.15518300  | 3.18862600  |
| Cu | -3.61790300 | -1.41770600 | -0.01272300 |
| Cu | -0.76050000 | -5.10160100 | 3.08405700  |
| Cu | 3.04217600  | -2.42284700 | -0.01674800 |
| Cu | 4.80072500  | 1.88330800  | 3.08708900  |
| Cu | 0.57935700  | 3.82607700  | -0.02627200 |

3-ring\_geom\_3-Cu8O4\_b3lyp\_lanl2dz

|    |             |            |             |
|----|-------------|------------|-------------|
| O  | -3.74784600 | 0.83446700 | -2.50549000 |
| Cu | -3.86991400 | 1.80195000 | -0.90915300 |

|    |             |             |             |
|----|-------------|-------------|-------------|
| O  | -3.74620600 | -0.83286400 | 2.51185900  |
| Cu | -3.87344300 | 0.89493100  | 1.80556200  |
| Cu | -1.88335000 | -0.91351200 | 2.75899000  |
| O  | -3.78082900 | -2.56476400 | -0.85080000 |
| Cu | -3.87377300 | -0.89311700 | -1.79873800 |
| Cu | -3.86850900 | -1.79846700 | 0.91358400  |
| O  | -3.77721800 | 2.56529800  | 0.85603500  |
| Cu | -1.89326800 | -2.81749800 | -0.93392900 |
| O  | 0.01825500  | 0.85207800  | -2.58019800 |
| Cu | -1.88576900 | 0.91220000  | -2.75981100 |
| Cu | -0.00137000 | 1.81018000  | -0.91123500 |
| O  | 0.01977900  | -0.85684900 | 2.57295200  |
| Cu | -0.00031900 | 0.91128200  | 1.81616000  |
| Cu | 1.88972100  | -0.93387100 | 2.81547500  |
| O  | -0.02265100 | -2.57773100 | -0.86110500 |
| Cu | -0.00047800 | -0.91398500 | -1.81848700 |
| Cu | -0.00162200 | -1.81481500 | 0.90710600  |
| O  | -0.02021900 | 2.57484500  | 0.85868400  |
| Cu | -1.88973500 | 2.81912200  | 0.93502200  |
| Cu | 1.88151400  | -2.76070600 | -0.91377500 |
| O  | 3.77564600  | 0.85065900  | -2.56761300 |
| Cu | 1.88841200  | 0.92941900  | -2.82323100 |
| Cu | 3.87699900  | 1.79747000  | -0.89822300 |
| O  | 3.77772600  | -0.85505900 | 2.56390000  |
| Cu | 3.86556200  | 0.91063800  | 1.79652100  |
| O  | 3.74418300  | -2.51414100 | -0.83046200 |
| Cu | 3.86355800  | -0.91543800 | -1.79936100 |



|    |             |             |             |
|----|-------------|-------------|-------------|
| Cu | 3.87500300  | -1.80495500 | 0.89483500  |
| O  | 3.74681100  | 2.50719000  | 0.82421200  |
| Cu | 1.88401500  | 2.75583400  | 0.90867400  |
| Cu | -5.08351400 | 3.80644300  | 1.21889800  |
| Cu | -5.09326300 | -3.79501200 | -1.22286100 |
| Cu | 5.10452900  | 1.23711900  | -3.77385000 |
| Cu | 5.09248300  | -1.22055800 | 3.79404000  |

CI calculations

Cu36O18\_barel\_H2O for CI calculations

|    |                 |                 |                 |
|----|-----------------|-----------------|-----------------|
| O  | 0.000000000000  | 3.359170936338  | 0.000000000000  |
| O  | 2.909127366193  | 1.679585468741  | 0.000000000000  |
| O  | 2.909127367183  | -1.679585467025 | 0.000000000000  |
| O  | 0.000000001981  | -3.359170936338 | 0.000000000000  |
| O  | -2.909127365202 | -1.679585470457 | 0.000000000000  |
| O  | -2.909127368174 | 1.679585465309  | 0.000000000000  |
| Cu | 4.216558832014  | 0.000000001243  | 0.000000000000  |
| Cu | 1.879877951257  | 0.000000000554  | 0.000000000000  |
| Cu | 1.769622655567  | -3.065076346187 | 1.186101621212  |
| Cu | 1.769622655567  | -3.065076346187 | -1.186101621212 |
| Cu | -2.108279413494 | -3.651647066527 | 0.000000000000  |
| Cu | -0.939938974508 | -1.628022062450 | 0.000000000000  |
| Cu | -3.539245308120 | -0.000000003131 | 1.186101621212  |

Cu -3.539245308120 -0.000000003131 -1.186101621212  
Cu -2.108279419956 3.651647062796 0.000000000000  
Cu -0.939938977389 1.628022060787 0.000000000000  
Cu 1.769622650143 3.065076349318 1.186101621212  
Cu 1.769622650143 3.065076349318 -1.186101621212  
O 1.679585466428 2.909127367528 -3.560131200841  
O 3.359170936338 0.000000002670 -3.560131200841  
O 1.679585471053 -2.909127364858 -3.560131200841  
O -1.679585464713 -2.909127368518 -3.560131200841  
O -3.359170936338 -0.000000004651 -3.560131200841  
O -1.679585472769 2.909127363867 -3.560131200841  
Cu 3.065076348638 -1.769622651322 -2.374029579629  
Cu 3.065076348638 -1.769622651322 -4.746232822054  
Cu 0.000000004595 -4.216558832014 -3.560131200841  
Cu 0.000000002049 -1.879877951257 -3.560131200841  
Cu -3.065076344781 -1.769622658003 -2.374029579629  
Cu -3.065076344781 -1.769622658003 -4.746232822054  
Cu -3.651647068203 2.108279410592 -3.560131200841  
Cu -1.628022063197 0.939938973214 -3.560131200841  
Cu -0.000000005944 3.539245308120 -2.374029579629  
Cu -0.000000005944 3.539245308120 -4.746232822054  
Cu 3.651647061120 2.108279422858 -3.560131200841  
Cu 1.628022060040 0.939938978683 -3.560131200841  
O 1.679585466428 2.909127367528 3.560131200841  
O 3.359170936338 0.000000002670 3.560131200841  
O 1.679585471053 -2.909127364858 3.560131200841  
O -1.679585464713 -2.909127368518 3.560131200841

O -3.359170936338 -0.000000004651 3.560131200841  
O -1.679585472769 2.909127363867 3.560131200841  
Cu 3.065076348638 -1.769622651322 4.746232822054  
Cu 3.065076348638 -1.769622651322 2.374029579629  
Cu 0.000000004595 -4.216558832014 3.560131200841  
Cu 0.000000002049 -1.879877951257 3.560131200841  
Cu -3.065076344781 -1.769622658003 4.746232822054  
Cu -3.065076344781 -1.769622658003 2.374029579629  
Cu -3.651647068203 2.108279410592 3.560131200841  
Cu -1.628022063197 0.939938973214 3.560131200841  
Cu -0.000000005944 3.539245308120 4.746232822054  
Cu -0.000000005944 3.539245308120 2.374029579629  
Cu 3.651647061120 2.108279422858 3.560131200841  
Cu 1.628022060040 0.939938978683 3.560131200841  
O 2.298799904567 -5.181785342187 1.186101621212  
H 3.055523370637 -5.767584556830 1.186101621212  
H 1.542076438497 -5.767584556830 1.186101621212

Cu24O12\_bareI\_H2O for CI calculations

O 0.000000000000 3.337887475092 0.000000000000  
O 2.890695348075 1.668943738114 0.000000000000  
O 2.890695349059 -1.668943736409 0.000000000000  
O 0.000000001969 -3.337887475092 0.000000000000  
O -2.890695347091 -1.668943739819 0.000000000000  
O -2.890695350044 1.668943734704 0.000000000000

Cu 4.172737944569 0.000000001231 0.000000000000  
Cu 1.881469482610 0.000000000555 0.000000000000  
Cu 1.741842465795 -3.016959646114 1.173150817989  
Cu 1.741842465795 -3.016959646114 -1.173150817989  
Cu -2.086368969798 -3.613697064767 0.000000000000  
Cu -0.940734740184 -1.629400369033 0.000000000000  
Cu -3.483684928625 -0.000000003082 1.173150817989  
Cu -3.483684928625 -0.000000003082 -1.173150817989  
Cu -2.086368976192 3.613697061076 0.000000000000  
Cu -0.940734743067 1.629400367368 0.000000000000  
Cu 1.741842460457 3.016959649196 1.173150817989  
Cu 1.741842460457 3.016959649196 -1.173150817989  
O 1.668943735816 2.890695349402 -3.538765072605  
O 3.337887475092 0.000000002653 -3.538765072605  
O 1.668943740412 -2.890695346748 -3.538765072605  
O -1.668943734111 -2.890695350386 -3.538765072605  
O -3.337887475092 -0.000000004622 -3.538765072605  
O -1.668943742117 2.890695345764 -3.538765072605  
Cu 3.016959648526 -1.741842461618 -2.365614254617  
Cu 3.016959648526 -1.741842461618 -4.711915890594  
Cu 0.000000004547 -4.172737944569 -3.538765072605  
Cu 0.000000002050 -1.881469482610 -3.538765072605  
Cu -3.016959644729 -1.741842468193 -2.365614254617  
Cu -3.016959644729 -1.741842468193 -4.711915890594  
Cu -3.613697066426 2.086368966925 -3.538765072605  
Cu -1.629400369781 0.940734738889 -3.538765072605  
Cu -0.000000005851 3.483684928625 -2.365614254617

Cu -0.000000005851 3.483684928625 -4.711915890594  
Cu 3.613697059417 2.086368979064 -3.538765072605  
Cu 1.629400366621 0.940734744362 -3.538765072605  
O 2.298799904567 -5.181785342187 -1.186101621212  
H 3.055523370637 -5.767584556830 -1.186101621212  
H 1.542076438497 -5.767584556830 -1.186101621212

Cu8O4\_H2O for CI calculations

O 0.000000000000 0.000000000000 0.000000000000  
O 1.957163855370 -3.201938028566 -3.504433633354  
O -1.182796777844 -2.944528365451 -1.724111784984  
O 3.088158220329 -0.182623218438 -1.881278157937  
Cu 0.000000000000 0.000000000000 1.770499540632  
Cu 1.611797583728 0.000000000000 -0.838564577445  
Cu 2.637028625800 -1.699395087652 -2.759799677477  
Cu 1.978297996744 -3.302590961187 -5.271504701373  
Cu -0.694103928256 -1.478076682800 -0.785747208259  
Cu 0.323574588483 -3.169412496943 -2.706858893573  
Cu 4.678380311660 -0.151458098333 -1.105803478033  
Cu -2.791511054133 -2.992272372754 -2.458970871060  
O -4.525166368819 -3.071728266681 -3.220364156380  
H -5.049862680449 -3.868611396194 -3.086182905272  
H -5.116041995205 -2.321726361661 -3.093967380581

## Details of the Configuration Interaction Method and calculations

### Theory

Electronic systems are described by a configuration interaction embedding method that is designed to give an accurate many-electron description of the adsorbate-surface region of a metal or oxide and electron transfer states. Many applications of the method to ground and excited states of adsorbates on metals have been reported previously and details of the method can be found in earlier publications and previous progress reports. A brief summary is given below.

Calculations are carried out for the full electrostatic Hamiltonian of the system (except for core electron potentials)

$$\mathbf{H} = \sum_i^N \left[ -\frac{1}{2} \nabla_i^2 + \sum_k^Q \left( \frac{-Z_k}{r_{ik}} + V_{ik}^{core} \right) \right] + \sum_{i<j}^N \frac{1}{r_{ij}}$$

Wavefunctions are constructed by self-consistent-field (SCF) and multi-reference configuration interaction (CI) expansions

$$\Psi = \sum_k c_k (n!)^{1/2} \det(\chi_1^k \chi_2^k \dots \chi_n^k) = \sum_k c_k \Phi_k$$

In the present work, the electron transfer state to the adsorbed water molecule lies several eV above the ground state and even for the small clusters investigated many intervening lower energy states exist.

In order to focus on the electron transfer excited states relevant to the dissociation of water we proceed as follows. An initial, single-determinant, self-consistent field (SCF) calculations on the positive ion of the water-cluster complex are carried out. Examination of the virtual eigenvalue spectrum allows the positive ion orbitals containing appreciable contributions from water basis functions to be identified. CI calculations on the neutral water-cluster complex are performed using the positive ion occupied and virtual orbitals. Configurations involving water and the ground state configuration are used as initial descriptions of the states and single and double excitations from each ground and excited configuration are generated. Proceeding in this way allows one to construct electronic states that are orthogonal to and effectively non-interacting with lower lying states and thereby assuring an upper bound on the excited state energy. Not all occupied orbitals are included in the active space of the configuration interaction and this means that there is an energy defect

associated with the description of the ground state using positive ion orbitals. This defect is calculated by performing a constrained SCF calculation on the ground state using a fixed core of positive ion orbitals and comparing the result with the unconstrained SCF calculation. The energy defects calculated in this way are  $\sim 0.25\text{eV}$  but vary slightly for the different clusters calculated.

Cu8O4

# active electrons in CI= 22

Threshold for single and double excitation

(selection based on second order perturbation energy)=  $3 \times 10^{-6}$

# determinants in CI 72033

Ground state defect=0.30eV

Cu24O12

# active electrons in CI= 18

Threshold for single and double excitation

(selection based on second order perturbation energy)=  $2 \times 10^{-6}$

# determinants in CI 54246

Ground state defect=0.26eV

Cu36O18 tube

# active electrons in CI= 18

Threshold for single and double excitation

(selection based on second order perturbation energy)=  $2 \times 10^{-6}$

# determinants in CI 59909

Ground state defect=0.26eV

Copper. Basis simplex optimization of exponents and coefficients for Cu  $^1S$  ground state

Orbital (number of gaussians in expansion)

1s (12)

2s (10)

3s (7)

4s (4)

2p (7)

3p (6)

4p (2)

Oxygen. (Hartree-Fock atomic orbitals plus additional correlation basis functions plus a diffuse Rydberg-like oxygen basis function.

1s (8)

2s (5)

2s' (1)

2p (5)

2p' (1)

s' (3)

p' (3)

d' (2)

s'' (1) 0.05 exp

Hydrogen

1s (5)

1s' (1)

2p (1)
